# Supplementary material for: MicroRNA-15a/16/SOX5 axis promotes migration, invasion and inflammatory response in rheumatoid arthritis fibroblast-like synoviocytes
Source: Aging (Albany NY). 2020 Jul 17;12(14):14376–90. doi: 10.18632/aging.103480 (PMC7425471; doi:10.18632/aging.103480)
Supplement: Supplementary Figures [file aging-12-103480-s002..pdf]

## SUPPLEMENTARY FIGURES

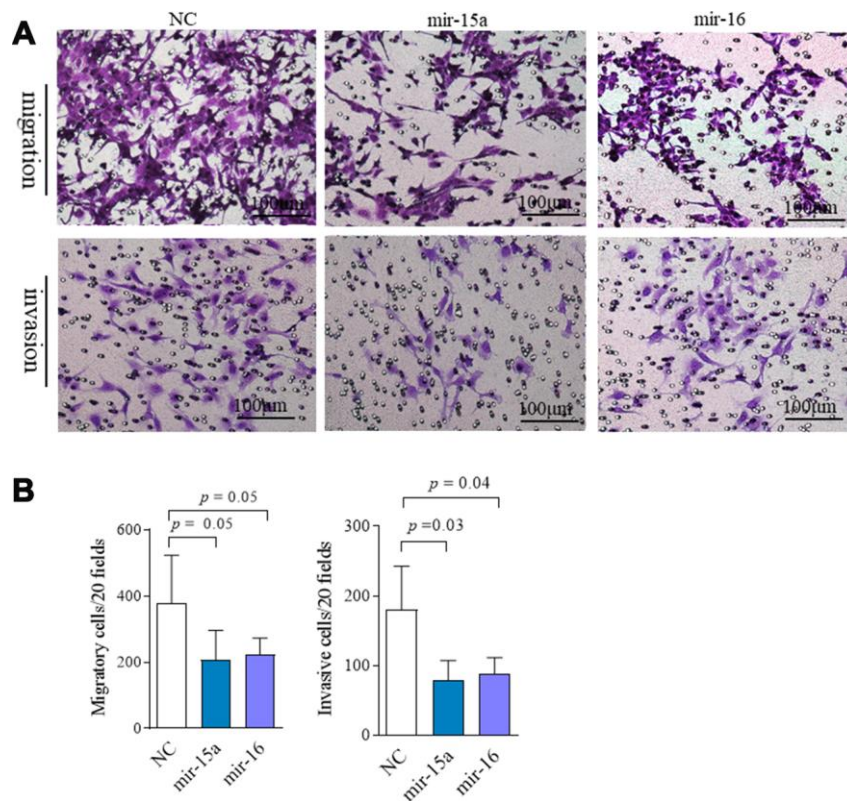

**Supplementary Figure 1. Regulation of miR-15a/16/SOX5 axis on RA-FLS migration and invasion.** Following transfected with miR-15a, miR-16 mimics and miR-control for 48h, primary RA-FLS subjected to transwell (A, above) and transwell chamber invasion assay (A, below) after 24h. (B) Graphs show the quantitation data derived from the left figure A. Data are each representative of 3 independent experiments.

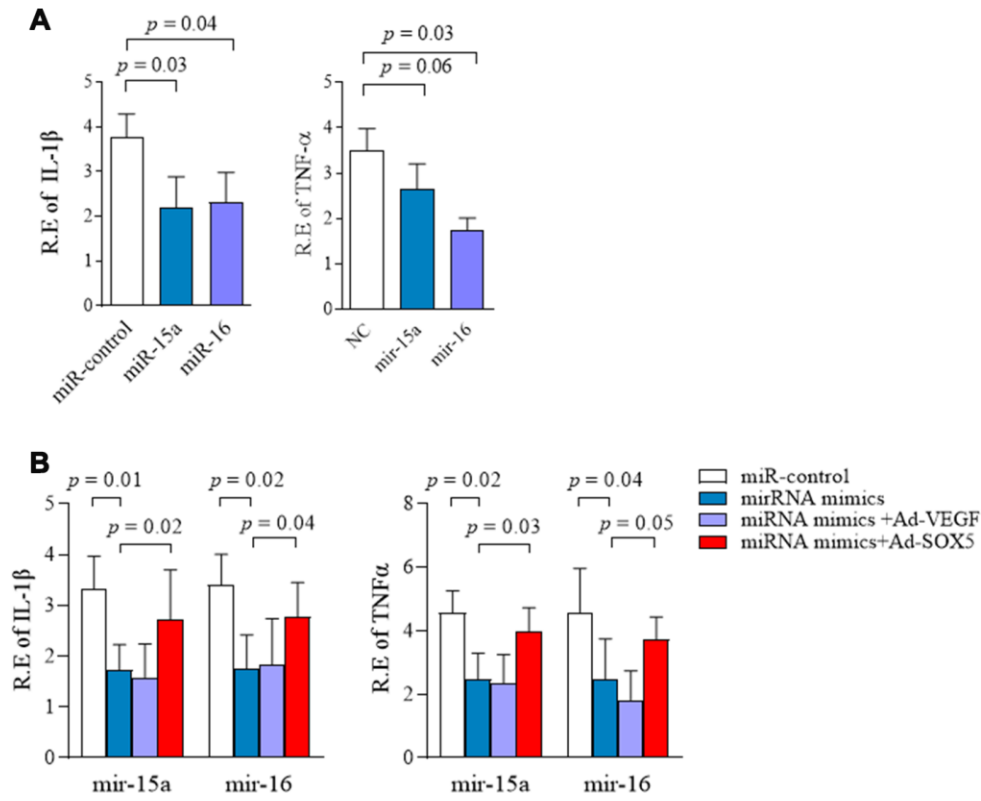

**Supplementary Figure 2. Regulation of miR-15a/16/SOX5 axis on cytokine production in primary RA-FLS.** (A) Following transfected with miR-15a, miR-16 mimics and miR-control for 48h, expression of *IL-1 $\beta$*  and *TNF- $\alpha$*  was detected by qRT-PCR. (B) *SOX5* overexpression alleviates the miR-15a/16 mimics-mediated inhibitory roles on *IL-1 $\beta$*  and *TNF- $\alpha$*  expression in FLS. Bars show the mean $\pm$ SD of 3 independent experiments.

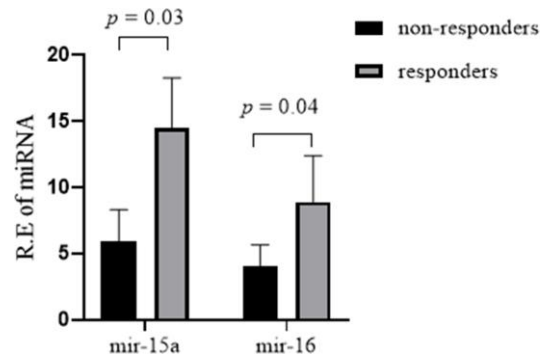

**Supplementary Figure 3. Expression of miR-15a miR-16 in synovial tissues from responders (n=10) and non responders (n=10) of DMARDs therapy** (non-responders are defined as DAS28>3.2 after more than three months DMARDs treatment).
